# Supplementary material for: Viral Molecular Mimicry Influences the Antitumor Immune Response in Murine and Human Melanoma
Source: Oxford University Press journal article supplement (doi:10.1158/2326-6066.cir-20-0814), 2021-06-08
Supplement: 23266066cir200814-sup-252395_3_supp_7063990_qt40xd.docx [file 23266066cir200814-sup-252395_3_supp_7063990_qt40xd.docx]

**Supplementary Table and Figures**

**Supplementary Table S1**. Patient characteristics. The Eastern Cooperative Oncology Group (ECOG) performance status (1). Stage classification, AJCC7 Metastasis stage (2): M1a = metastasis in distant skin sites or areas under the skin or in distant lymph nodes with normal LDH, M1b = metastasis in lung with normal LDH levels, M1c = metastasis in internal organ or any other metastasis with elevated LDH. Treatment responses evaluated using the RECIST-criteria (3); Best achieved response during anti-PD1 therapy: CR = complete response, PR = partial response, SD = stable disease, PD = progressive disease. Response status; Responder (CR, PR or SD > 6mo), non-responder (SD < 6mo, PD). Pretreatment anti-CMV-IgG; High ≥ 93 UA/ml < Low.

**Supplementary Table S2***.* Peptides used for the animal experiments.

**Supplementary Table S3**. Peptides used for *in vitro* experiments with human PBMCs. The peptides labelled as T#/V# were used for the ELISpot and cross-reactivity assay (T2/V2 and T5/V5).

**Supplementary Figure S1**: Gating strategy for the flow cytometry analysis shown in Figure 4.

**Supplementary Figure S2**: Experimental design for cross-reactivity assay. On day 0 primary human PBMCs were in vitro stimulated with matching viral and tumor peptides, on day 2 IL2 was added to the culture in order to sustain the primary cell culture until day 8 when GolgiStop was added. After inhibition by GolgiStop on day 9, the IFNγ-positive and -negative fractions of CD8+ T cells were sorted using FACS for TCRβ deep sequencing.

**Supplementary Figure S3**. Predicted affinity of the original tumor and respective similar viral pool of peptides to the murine MHC class I. 50nM and 500nM are highlighted as dotted lines.

**Supplementary Figure S4**. Average tumor growth of mice preimmunized with viral peptides similar to TRP2 and treated with Adenovirus coated with gp100 peptide (PeptiCRAd gp100).

**Supplementary Figure S5**. Kaplan-Meier curve of anti-CMV-IgG high patients (blue line, n=7) compared to anti-CMV-IgG low (pink line, n=5) patients (p=0.05) using Cox regression model. Patients were divided based on their pretreatment anti-CMV-IgG titer as higher, equal (≥) or lower (<) than the median. CMV-seronegative patients were excluded from this analysis. Patients that ended their treatment due to severe adverse effects were censored (black tic marks) (A). Kaplan-Meier curve of anti-EBV-IgG high patients (blue line, n=10) compared to anti-EBV-IgG low (pink line, n=4) patients (p>0.99) using Cox regression model. Patients were divided based on their pretreatment anti-EBV-IgG titer as higher, equal (≥) or lower (<) the median. EBV-seronegative patients were excluded from this analysis. Patients that ended their treatment due severe adverse effects were censored (black tic marks) (B). The immunoglobulin assay of IgA, IgG and IgM serum levels (g/L) between responders (R, white dots) and non-responders (NR, black squares) before initiation (D0) and after one (1mo) and three months (3mo) of ICPI-therapy. The statistical difference between timepoints is calculated with Student’s t-test and the range of p value is labeled with asterisk (*P < 0.05) (C, D, E).

**Supplementary Figure S6**. Levels of IFN-γ detected by ELISpot performed on. PBMCs derived from a subject (HLA-A02+) with high serum level of anti-CMV Ab in order to validate the peptides in Supplementary Table S2.
